# Supplementary material for: The synergistic effect of metallic molybdenum dioxide nanoparticle decorated graphene as an active electrocatalyst for an enhanced hydrogen evolution reaction
Source: Royal Society of Chemistry journal article supplement (doi:10.1039/c5ta00622h), 2015-01-01
Supplement: c5ta00622h1.pdf [file c5ta00622h1.pdf]

## SUPPORTING INFORMATION

### The Synergistic Effect of Metallic Molybdenum Dioxide Nanoparticles Decorated Graphene as Active Electrocatalyst for Enhanced Hydrogen Evolution Reaction

Xiao Xie, Ling Lin, Rui-Yang Liu, Yi-Fan Jiang, Qing Zhu, and An-Wu Xu\*

*Division of Nanomaterials and Chemistry, Hefei National Laboratory for Physical Sciences at Microscale, Department of Chemistry, University of Science and Technology of China, Hefei 230026, China.*

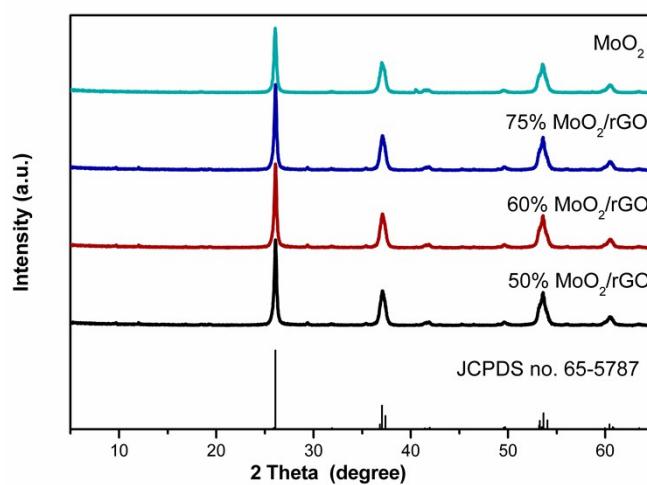

**Fig. S1** XRD patterns of MoO<sub>2</sub> and MoO<sub>2</sub>/rGO composites prepared with different contents of rGO under same conditions. The increase of rGO from 0 wt% to 50 wt% hardly influenced the crystal structure of MoO<sub>2</sub>. All samples were crystallized into monoclinic phase by the hydrothermal treatment. Standard PDF card of the MoO<sub>2</sub> was given as reference.

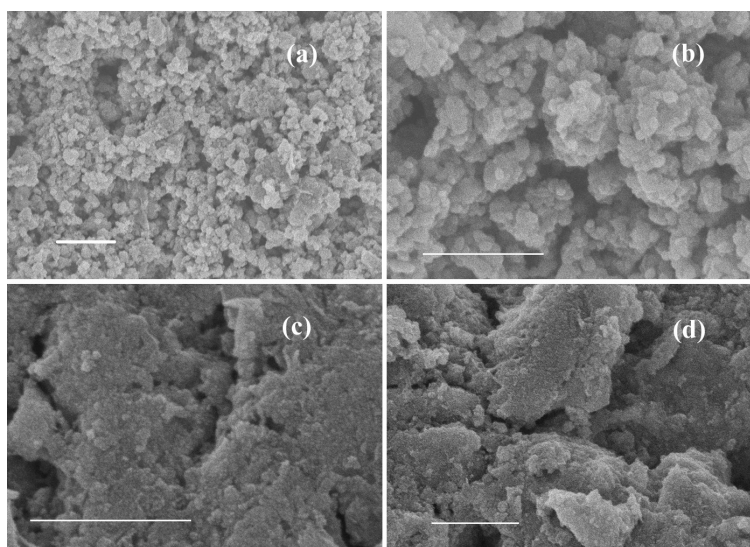

**Fig. S2** SEM images of obtained MoO<sub>2</sub> and MoO<sub>2</sub>/rGO composites with different contents: (a) MoO<sub>2</sub>, (b) 75 wt% MoO<sub>2</sub>/rGO, (c) 60 wt% MoO<sub>2</sub>/rGO and (d) 50 wt% MoO<sub>2</sub>/rGO. The scale bars are 500 nm.

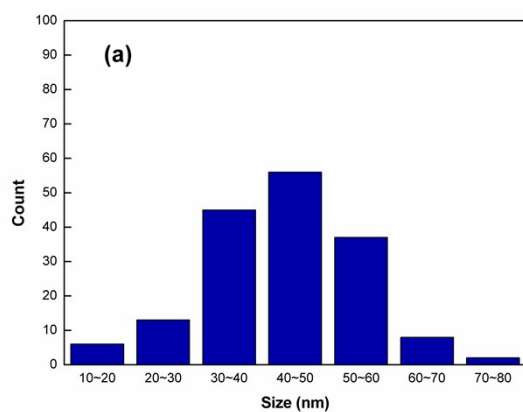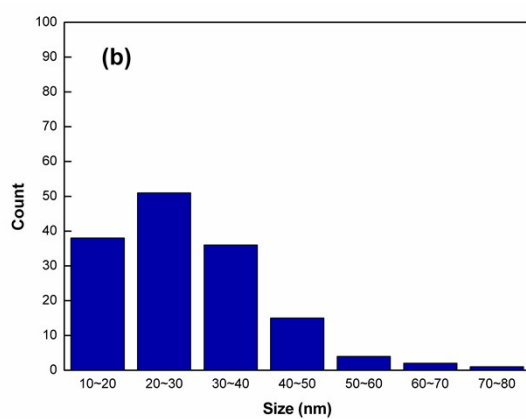

**Fig. S3** Relevant size distribution of (a) MoO<sub>2</sub> and (b) 60 wt% MoO<sub>2</sub>/rGO composite.

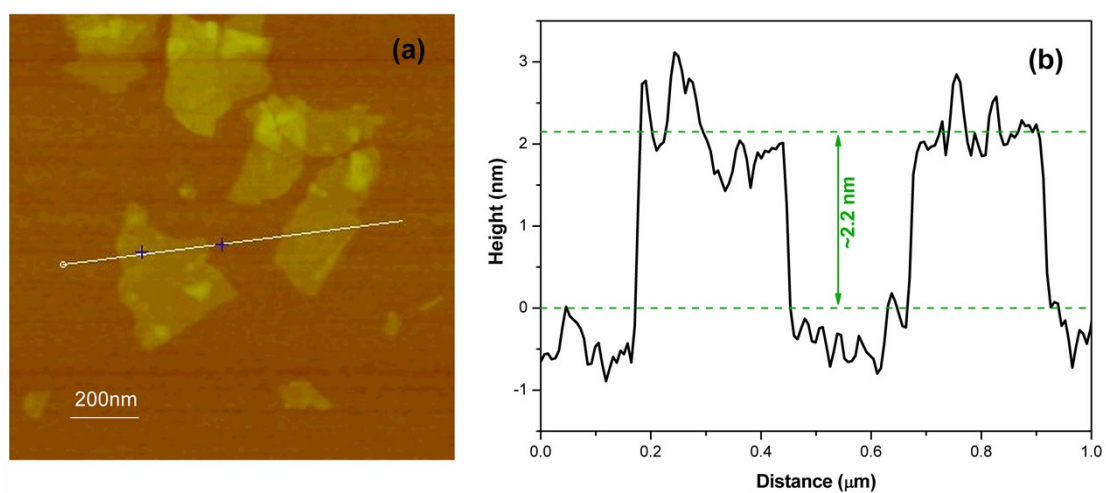

**Fig. S4** (a) AFM image of the rGO nanosheets. (b) The corresponding height image of two random rGO nanosheets.

**Table S1** Ratios of Mo atoms with different valence states in obtained MoO<sub>2</sub> NPs and 60 wt% MoO<sub>2</sub>/rGO composite.

| Percentage of Mo Atoms with Different Valence States in Samples | Mo IV | Mo V  | Mo VI |
|-----------------------------------------------------------------|-------|-------|-------|
| MoO <sub>2</sub>                                                | 26.8% | 30.2% | 43.0% |
| MoO <sub>2</sub> /rGO                                           | 45.3% | 18.1% | 36.6% |

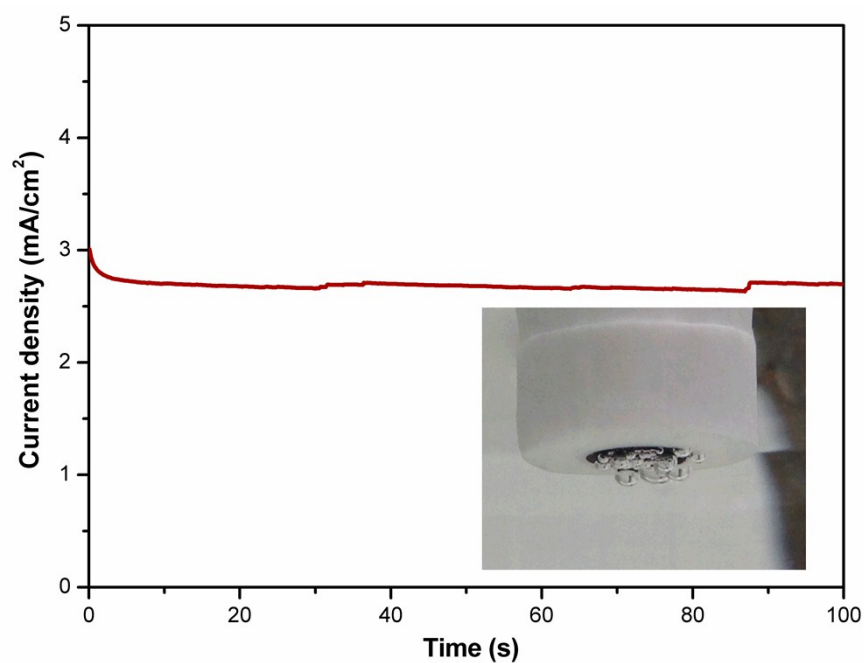

**Fig. S5** Chronoamperometric responses recorded on 60 wt% MoO<sub>2</sub>/rGO composite at a constant applied potential of  $-200$  mV vs RHE. Inset digital photos show the H<sub>2</sub> bubbles formed on 60 wt% MoO<sub>2</sub>/rGO composite modified GCE at the time point of 100 s. The measurements were performed in 0.5 M H<sub>2</sub>SO<sub>4</sub> solution.

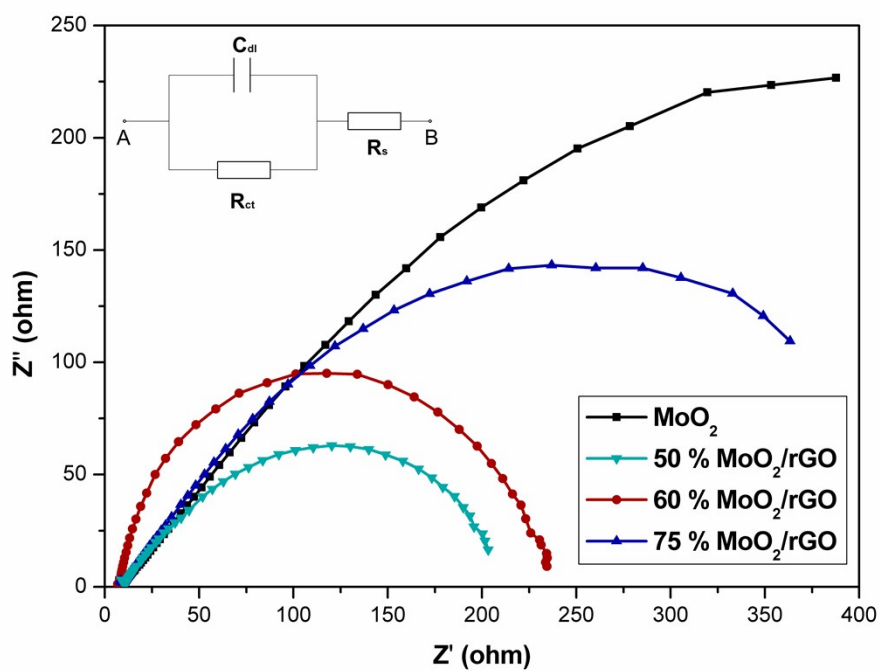

**Fig. S6** Electrochemical impedance spectroscopy of MoO<sub>2</sub>/rGO composites and MoO<sub>2</sub> at 250 mV vs. RHE. It can be seen when combined with rGO, the resistance of the sample decreased from 812 ohm (pure MoO<sub>2</sub>) to 205 ohm (50 wt% MoO<sub>2</sub>/rGO).

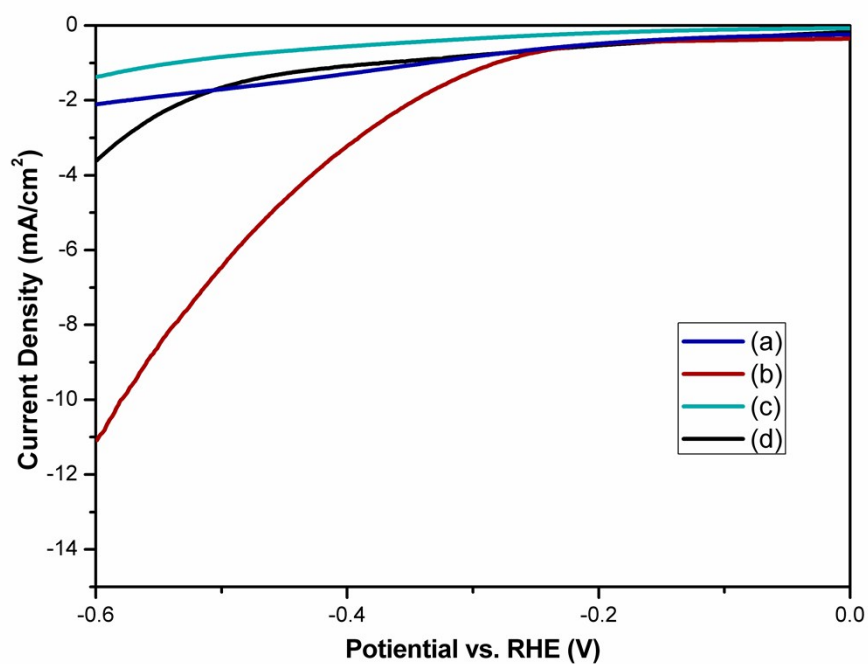

**Fig. S7** Polarization curves of (a) 60 wt% MoO<sub>2</sub>/rGO composite without calcination (b) 20 wt% MoO<sub>2</sub>/rGO composite (c) MoO<sub>3</sub> NPs and (d) MoO<sub>3</sub>/rGO composite. It is obvious that MoO<sub>2</sub>/rGO composite have poor activity without calcination. MoO<sub>3</sub> NPs and MoO<sub>3</sub>/rGO composite have low activity in HER.

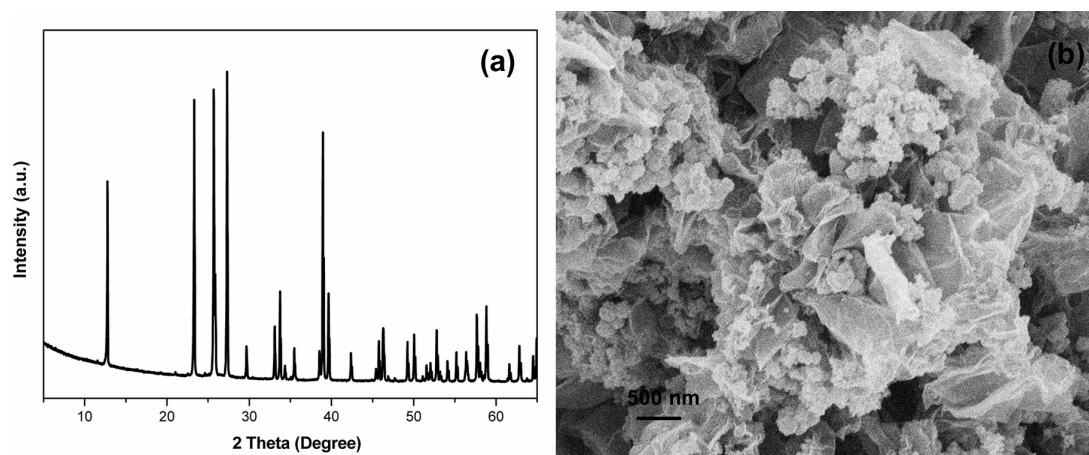

**Fig. S8** (a) XRD pattern and (b) SEM image of as-prepared MoO<sub>3</sub>/rGO composite.

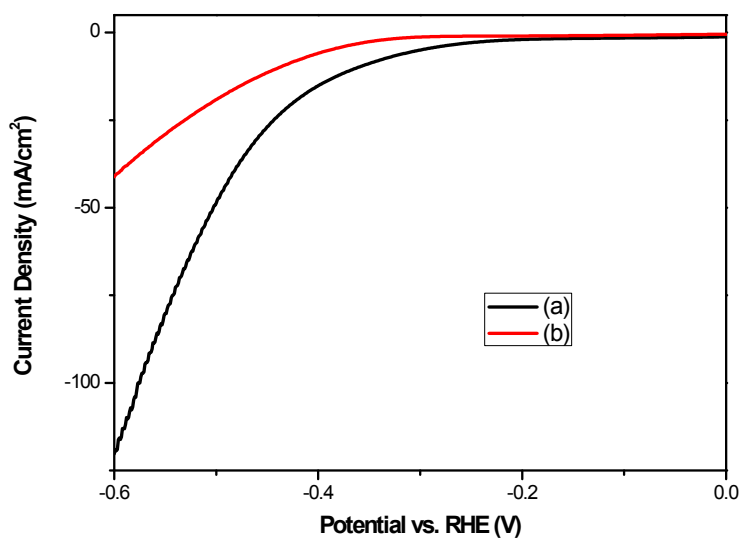

**Fig. S9** Polarization curves of (a) 60 wt% MoO<sub>2</sub>/rGO composite and (b) a mechanical mixed sample of 60 wt% MoO<sub>2</sub> and 40 wt% rGO. In sharp contrast, 60 wt% MoO<sub>2</sub>/rGO composite exhibit an overpotential of only 190 mV, which is markedly better than the mechanical mixed sample under the same catalyst loading. The enhanced performance in HER indicates that a strong synergistic effect was appeared during the synthesis process.

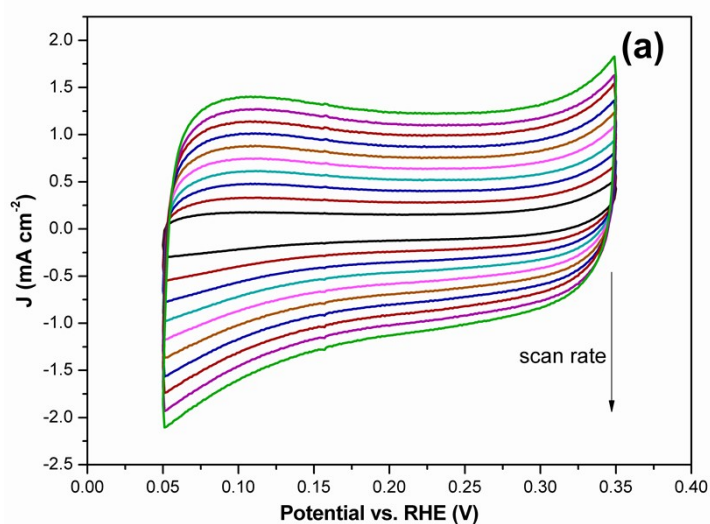

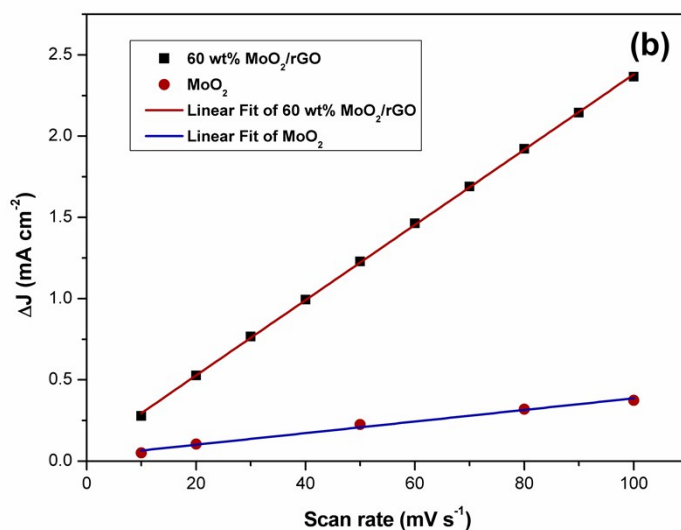

**Fig. S10** (a) Cyclic voltammograms of 60 wt% MoO<sub>2</sub>/rGO composite measured at different scanning rates (10-100 mV s<sup>-1</sup>) in 0.5 M H<sub>2</sub>SO<sub>4</sub> with the same loading. (b) Corresponding scanning rate dependence of the current density of 60 wt% MoO<sub>2</sub>/rGO and MoO<sub>2</sub> at 0.2 V vs. RHE.

It is generally supposed that the amount of active sites in HER is directly proportional to electrochemically active surface area. The electrochemically active surface area was assessed by capacitance measurements as it is presumed to be linearly proportional to the double layer capacitance ( $C_{dl}$ ).<sup>1, 2</sup> Therefore, the relative value of electrochemically active surface area can be obtained by normalization of  $C_{dl}$ . It can be seen from Fig. S10b that the slope of 60 wt% MoO<sub>2</sub>/rGO is almost 10 times bigger than that of MoO<sub>2</sub>, clearly demonstrating that with the presence of rGO, the MoO<sub>2</sub>/rGO composite has much larger amount of active sites in HER.

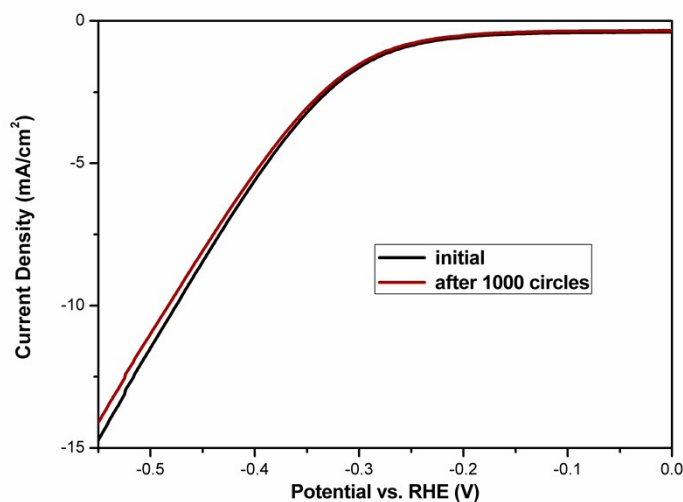

**Fig. S11** Linear sweep voltammograms of 60 wt% MoO<sub>2</sub>/rGO composite on the GC electrode



before and after 1000 cycles in alkaline condition (0.1 M KOH ); at the scan rate of 5 mV s<sup>-1</sup>.

**References:**

- (1) D. Merki, S. Fierro, H. Vrubel, and X. L. Hu, *Chem. Sci.* 2011, **2**, 1262-1267.
- (2) J. D. Benck, Z. B. Chen, L. Y. Kuritzky, A. J. Forman and T. F. Jaramillo, *ACS Catal.* 2012, **2**, 1916-1923.
